# Supplementary material for: Wavepacket dynamical study of H-atom tunneling in catecholate monoanion: the role of intermode couplings and energy flow
Source: Royal Society of Chemistry journal article supplement (doi:10.1039/d2cp03803j), 2022-12-13
Supplement: d2cp03803j1.pdf [file d2cp03803j1.pdf]

## Electronic Supplementary Information for Wavepacket dynamical study of H atom tunneling in catecholate monoanion: Role of intermode couplings and energy flow

Debabrata Bhattacharyya and Sai G. Ramesh

*Department of Inorganic and Physical Chemistry, Indian Institute of Science, Bangalore 560012, India*

TABLE S1. **Parameters for 1D Hamiltonians.** For each mode  $Q_j$ , a 1D potential cut  $V_{ad}(Q_j; \mathbf{Q}_o)$  is chosen to solve for eigenstates, where  $\mathbf{Q}_o$  represents the fixed values of other modes. We have chosen only one mode ( $Q_{10}$  for  $j = 1$  and  $Q_1$  for all other modes) to be non-zero in  $\mathbf{Q}_o$ . For the chosen cut for each  $Q_j$ , the location of the potential minimum  $Q_{j,min}$  is tabulated, along with the potential energy  $E_{j,min}$  and local frequency  $\tilde{\nu}_{j,min}$  (in  $\text{cm}^{-1}$ ) at this point.

| $Q_j$    | $Q_{fixed}$ | (Value) | $Q_{j,min}$ | $E_{j,min}$ | $\tilde{\nu}_{j,min}$ |
|----------|-------------|---------|-------------|-------------|-----------------------|
| $Q_1$    | $Q_{10}$    | (+2.02) | -2.02       | -930.4      | 4966.5                |
| $Q_7$    | $Q_1$       | (-1.26) | 0.06        | -536.5      | 597.1                 |
| $Q_{10}$ | $Q_1$       | (-2.02) | 1.68        | -936.2      | 823.7                 |
| $Q_{13}$ | $Q_1$       | (-1.26) | -0.06       | -536.9      | 832.0                 |
| $Q_{27}$ | $Q_1$       | (-1.26) | 0.08        | -540.1      | 1623.9                |
| $Q_{29}$ | $Q_1$       | (-1.58) | 0.40        | -631.7      | 2347.5                |

TABLE S2. **Eigenvalues of 1D Hamiltonians.** These are obtained from the solutions of the 1D Hamiltonians in primitive basis functions (see Phys. Chem. Chem. Phys. 24, 10887 (2022)). For mode  $Q_1$ , the eigenkets are additionally denoted by their parity.

| $Q_j$          | $ j_i\rangle$   | $\epsilon_i^{(j)}$ | $Q_j$          | $ j_i\rangle$  | $\epsilon_i^{(j)}$ |
|----------------|-----------------|--------------------|----------------|----------------|--------------------|
| $Q_1$          | $ 1_0^+\rangle$ | 186.6              | $Q_7$          | $ 7_0\rangle$  | -255.6             |
|                | $ 1_0^-\rangle$ | 246.7              |                | $ 7_1\rangle$  | 302.7              |
|                | $ 1_1^+\rangle$ | 1680.7             |                | $ 7_2\rangle$  | 859.0              |
|                | $ 1_1^-\rangle$ | 2483.3             |                | $ 7_3\rangle$  | 1416.8             |
|                | $ 1_2^+\rangle$ | 3702.5             | $ 7_4\rangle$  | 1975.0         |                    |
|                | $ 1_2^-\rangle$ | 5130.0             | $Q_{13}$       | $ 13_0\rangle$ | -137.1             |
|                | $ 1_3^+\rangle$ | 6701.5             |                | $ 13_1\rangle$ | 658.2              |
|                | $ 1_3^-\rangle$ | 8428.1             |                | $ 13_2\rangle$ | 1450.6             |
|                | $ 10_0\rangle$  | -583.8             |                | $ 13_3\rangle$ | 2243.5             |
|                | $ 10_1\rangle$  | 135.5              |                | $ 13_4\rangle$ | 3036.1             |
| $ 10_2\rangle$ | 857.0           | $Q_{27}$           |                | $ 27_0\rangle$ | 254.4              |
| $ 10_3\rangle$ | 1576.2          |                    | $ 27_1\rangle$ | 1840.3         |                    |
| $ 10_4\rangle$ | 2284.4          |                    | $ 27_2\rangle$ | 3425.7         |                    |
| $ 10_5\rangle$ | 2978.2          |                    |                |                |                    |
| $Q_{29}$       | $ 29_0\rangle$  | 468.3              |                |                |                    |
|                | $ 29_1\rangle$  | 2620.2             |                |                |                    |
|                | $ 29_2\rangle$  | 4665.3             |                |                |                    |

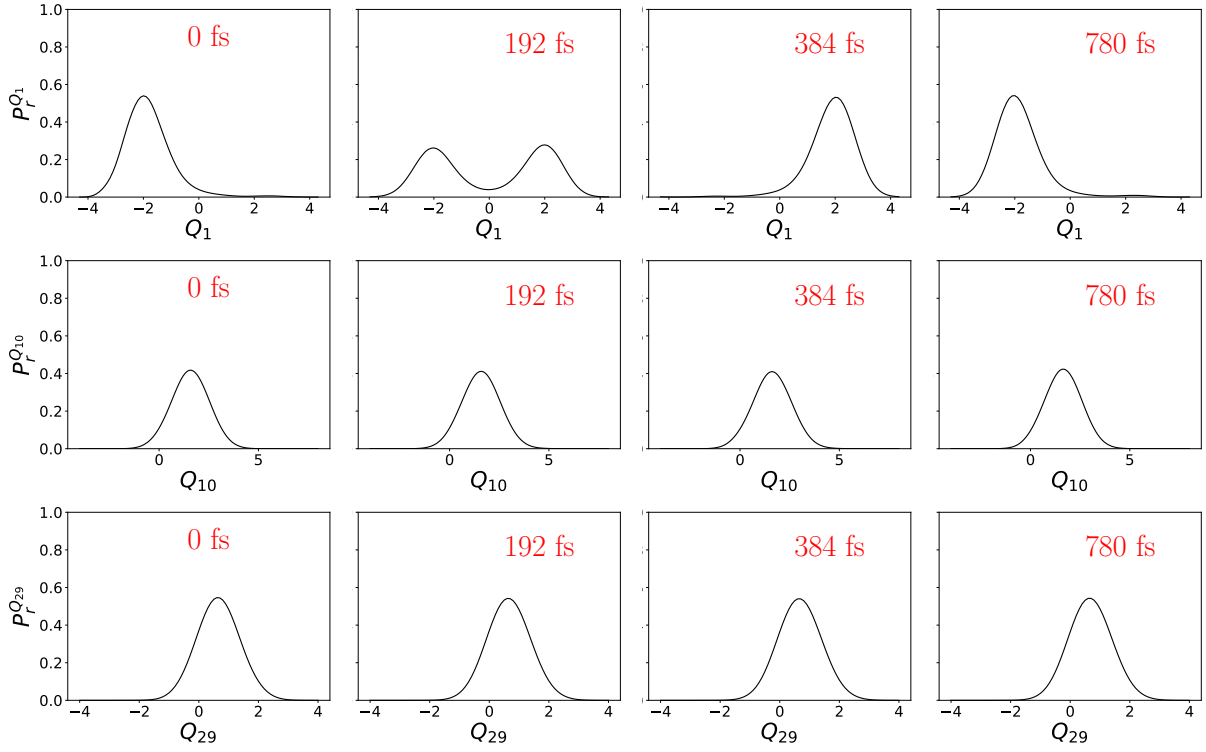

FIG. S1. **Tunneling from linear combination of eigenstates.** Reduced probability densities along  $Q_1$ ,  $Q_{10}$ , and  $Q_{29}$  are given for 3D dynamics carried out for the linear combination of the ground tunneling split pair of eigenfunctions. A coherent oscillation of the wavepacket is observed along  $Q_1$ , while it is essentially stationary along the other two modes.

TABLE S3. **Composition of direct product states used for wavepacket analyses.** Given in the table are the maximum excitations (number of quanta) in each mode that are used to construct left and right direct product states, which in turn are used for the expansion of the evolving wavepackets. For  $Q_1$ , both  $\pm$  state pairs are included for each excitation.

| Mode space                  | $\vec{v}_{max}$ | Mode space       | $\vec{v}_{max}$ |
|-----------------------------|-----------------|------------------|-----------------|
| $Q_1$ - $Q_{10}$            | (4, 13)         | $Q_1$ - $Q_7$    | (4, 5)          |
| $Q_1$ - $Q_{29}$            | (4, 4)          | $Q_1$ - $Q_{13}$ | (4, 5)          |
| $Q_1$ - $Q_{10}$ - $Q_{29}$ | (6, 7, 4)       | $Q_1$ - $Q_{27}$ | (4, 4)          |

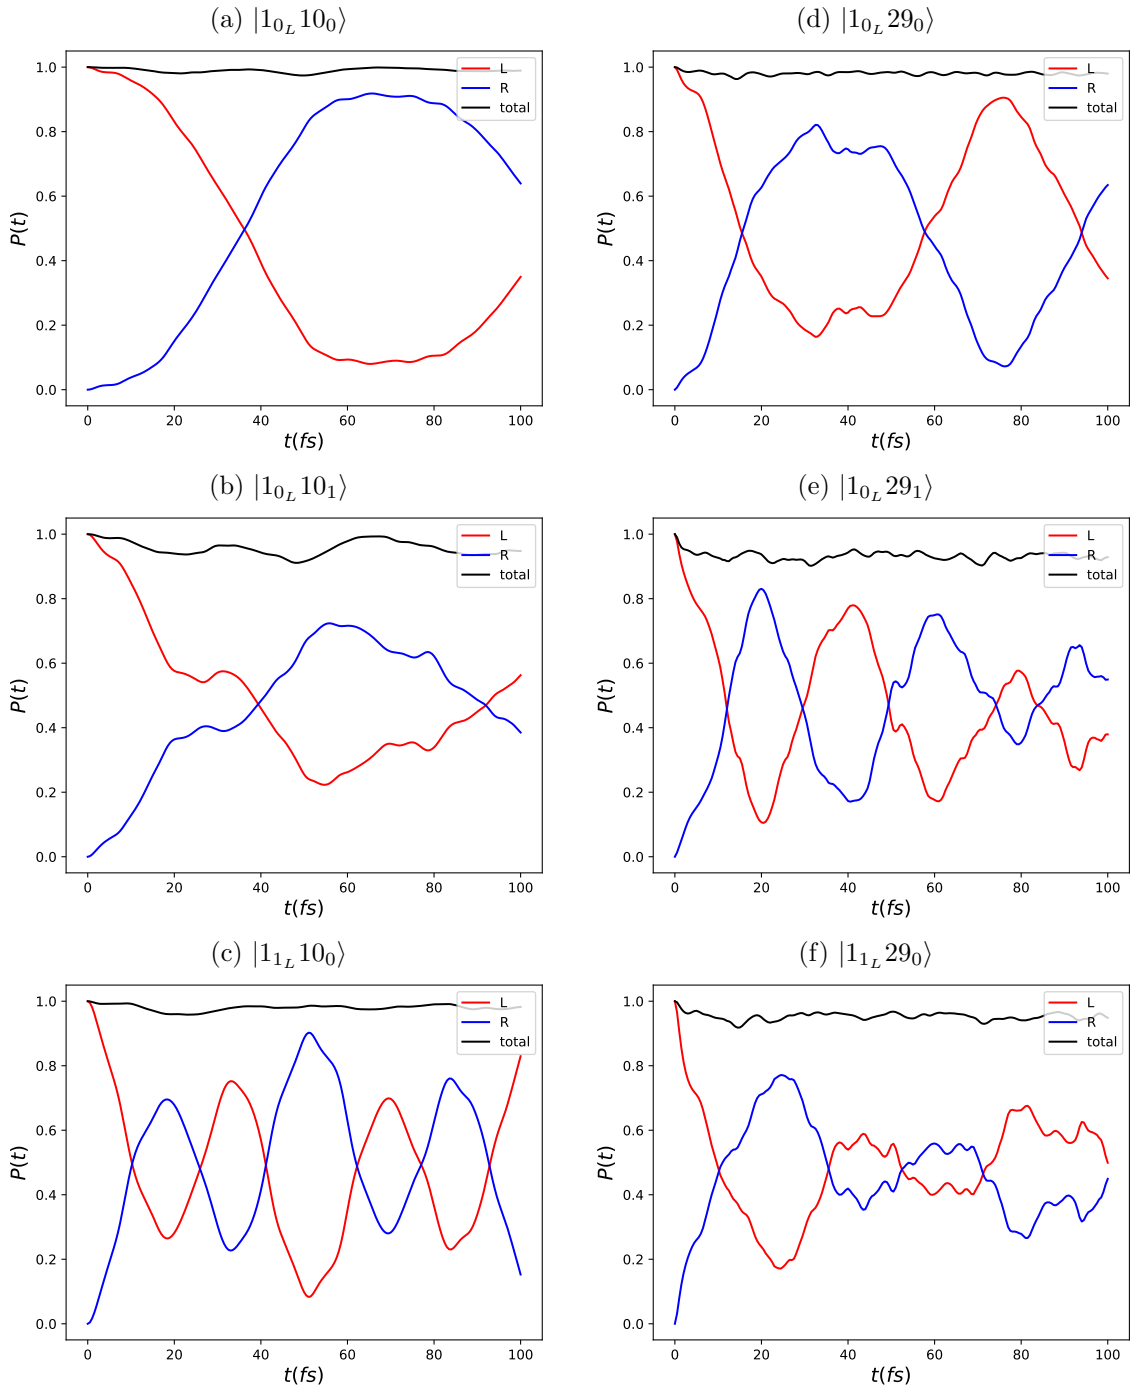

FIG. S2. **Cumulative projected populations for selected initial conditions.** For all  $Q_1$ - $Q_{10}$  initial states (a-c), the populations in direct products  $|1_{l_L, R} 10_m\rangle$  summed up to  $0 \leq l \leq 2$  and  $0 \leq m \leq 5$  are shown. Similarly, for all  $Q_1$ - $Q_{29}$  initial states (d-f), the populations in direct products  $|1_{l_L, R} 29_n\rangle$  summed up to  $0 \leq l \leq 3$  and  $0 \leq n \leq 2$  are shown. The red and blue curves are the total left and right-well populations, while the black curves are the sum of the two. Including more quanta in the summations provides minor changes to the cumulative probabilities. In this sense, the set of direct products used for the plots may be used for a qualitative and (nearly) quantitative analysis. However, we emphasize that the full set of direct products as given in table S3 was used for all the numerical analysis in this work, which includes several more direct products.

### Dynamics in 2D $Q_1$ - $Q_7$ , $Q_1$ - $Q_{13}$ and $Q_1$ - $Q_{27}$ spaces

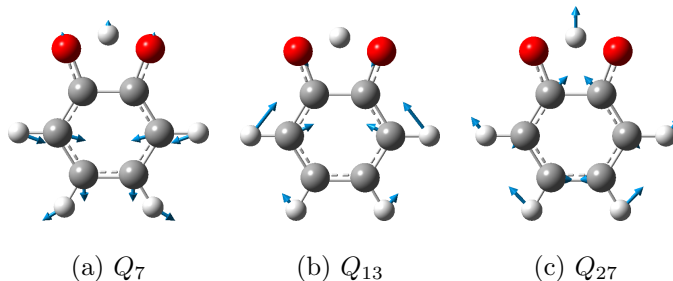

FIG. S3. Minimally coupled modes of CM

In our previous study (Phys. Chem. Chem. Phys. 24, 10887 (2022)) we noted that modes  $Q_7$ ,  $Q_{13}$  and  $Q_{27}$  are minimally coupled to the tunneling mode  $Q_1$ . The modes are shown in Figure S3. Consequently, the dynamics in 2D spaces involving these modes are expected to be simple in comparison to those for  $Q_1$ - $Q_{10}$  and  $Q_1$ - $Q_{29}$ . Figure S4 shows  $P_{tun}(t)$  for the different direct product initial states, viz.  $|1_{0_L}y_0\rangle$ ,  $|1_{0_L}y_1\rangle$ , and  $|1_{1_L}y_0\rangle$  where  $y = 7, 13$ , or  $27$ . The plots for all three modes are very similar, suggesting that the dynamics is largely independent of the identity of the minimally coupled mode. For both zero or one quantum of excitation in  $Q_y$ , the first passage times ( $\sim 20$  fs) are essentially the same. This suggests insensitivity of the dynamics, at least at short times, to  $Q_y$  excitation. However, the dynamics at later times is a slightly different for  $Q_{27}$  compared to  $Q_7$  and  $Q_{13}$ . With one quantum of excitation in  $Q_1$ , the tunneling is expectedly faster and is also very similar for all  $Q_y$ .

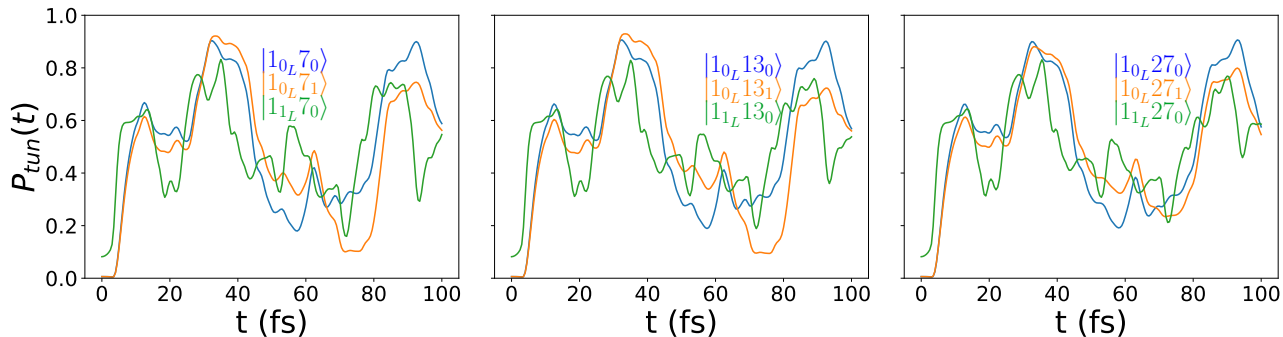

FIG. S4. Tunneling probabilities in the  $Q_1$ - $Q_7$ ,  $Q_1$ - $Q_{13}$ , and  $Q_1$ - $Q_{27}$  spaces for various initial states.

Figure S5 shows the mode energies as a function of time for various initial wavepackets. The  $\langle E^{(y)} \rangle$  are practically constant for  $Q_7$  and  $Q_{13}$ , and show a slow variation for  $Q_{27}$  over the length of the dynamics for the indicated initial states. These indicate essentially negligible or little energy flow between  $Q_1$  and  $Q_y$  in all cases. It is evident that  $\langle E^{(1)} \rangle$  shows an oscillatory trend. As the total energy is constant, the remainder of the energy is in  $\langle E_{res} \rangle$  whose trend (not shown) is an inverted version of  $\langle E^{(1)} \rangle$ . The non-constancy of  $\langle E^{(1)} \rangle$  is due to the choice of Hamiltonian partitioning described in the manuscript.

Figure S6 shows the average positions of the modes as a function of time for various initial states. The  $\langle Q_y \rangle$  is also almost constant for  $Q_7$  and  $Q_{13}$ , while  $Q_{27}$  shows a notable oscillatory trend.

The projected population for dynamics from various initial states is given in S7. Since  $Q_1$ - $Q_7$  and  $Q_1$ - $Q_{13}$  give almost identical pictures of the dynamics, only plots for selected initial states in  $Q_1$ - $Q_7$  and  $Q_1$ - $Q_{27}$  spaces are shown. The plots indicate that, for a given initial state, the populations are contained within the same  $|y_0\rangle$  or  $|y_1\rangle$  state. All the significant direct products differ only in the number of quanta in  $Q_1$ . This is corroborated by systematic analysis of the cumulative projected populations, where contributions from other states of  $Q_y$  negligibly change the sum.

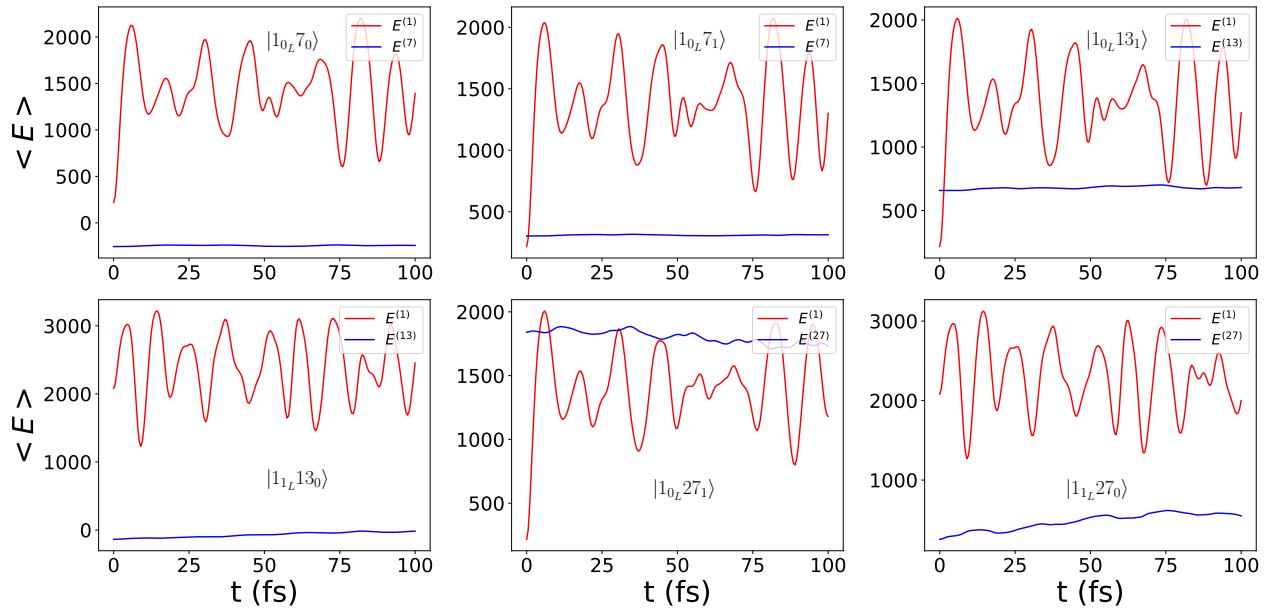

FIG. S5. Time-evolution of mode energies in  $\text{cm}^{-1}$  for various initial wavepackets in the  $Q_1$ - $Q_7$ ,  $Q_1$ - $Q_{13}$ , and  $Q_1$ - $Q_{27}$  spaces.

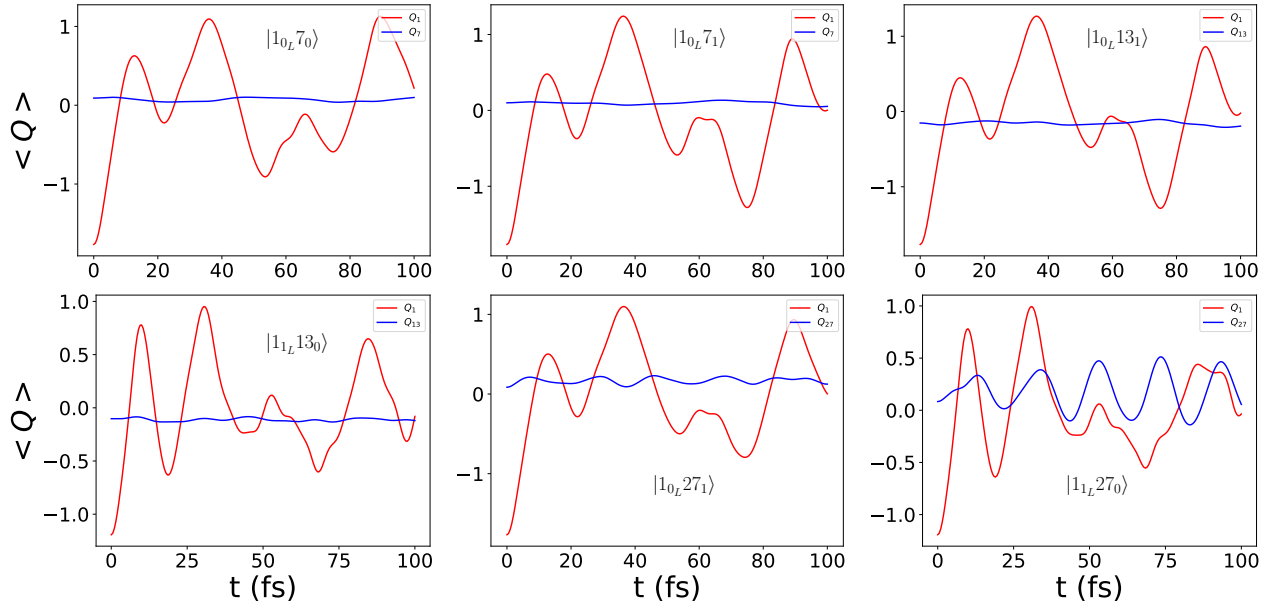

FIG. S6. Time-evolution of position expectation values of  $Q_1$  and  $Q_y$ ,  $y = 7, 13, 27$ , for various initial conditions.

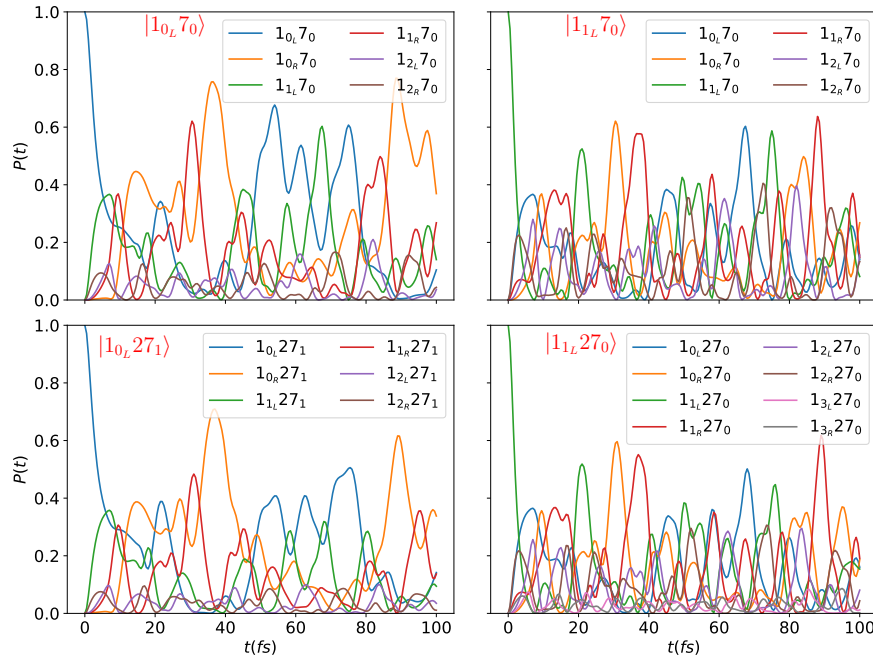

FIG. S7. Projected populations in various direct product states for the  $|1_{0_L} 7_0\rangle$ ,  $|1_{1_L} 7_0\rangle$ ,  $|1_{0_L} 27_1\rangle$ , and  $|1_{1_L} 27_0\rangle$  initial states.

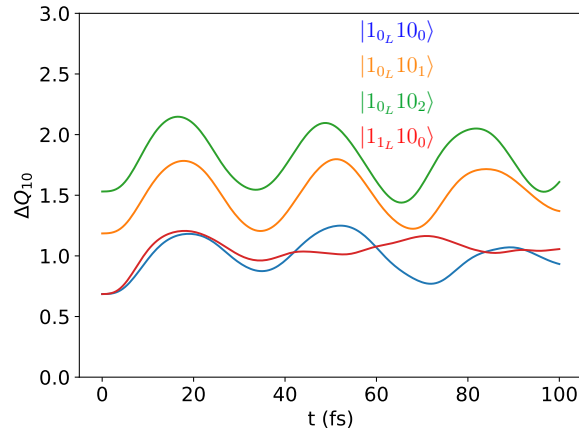

FIG. S8. Complementary to the plot of  $\langle Q_{10} \rangle$  shown in Fig. 4, here the widths of the evolving packets along  $Q_{10}$  are shown for all 2D initial conditions in the  $Q_1$ - $Q_{10}$  space. This is calculated as  $\Delta Q_{10} = \sqrt{\langle Q_{10}^2 \rangle - \langle Q_{10} \rangle^2}$ . Note that the widths increase with  $Q_{10}$  excitation as the initial packet is already more spread.

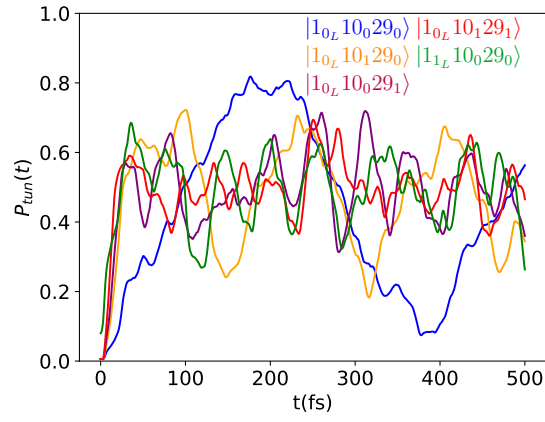

FIG. S9. Variation of tunneling probability in the  $Q_1$ - $Q_{10}$ - $Q_{29}$  space for various initial states. An abbreviated version of this plot with the time axis limited to 200 fs is given in Fig. 8.

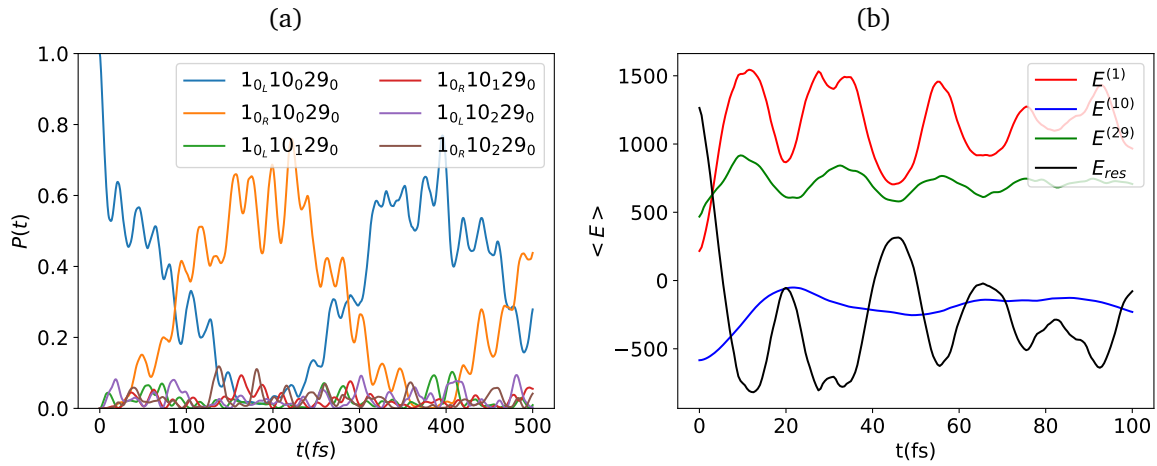

FIG. S10. (a) Projected population and (b) mode energy variation (in  $\text{cm}^{-1}$ ) for dynamics from the  $|1_{0L}10_029_0\rangle$  initial state.
